# Supplementary material for: Impact of chromatin context on Cas9-induced DNA double-strand break repair pathway balance
Source: PubMed Central journal article supplement — Mol Cell. 2021 May 20;81(10):2216–2230.e10. doi: 10.1016/j.molcel.2021.03.032 (PMC8153251; doi:10.1016/j.molcel.2021.03.032), 2021-05-20
Supplement: mmc1.pdf [file mmc1.pdf]

**Molecular Cell, Volume 81**

**Supplemental information**

**Impact of chromatin context on Cas9-induced**

**DNA double-strand break repair pathway balance**

**Ruben Schep, Eva K. Brinkman, Christ Leemans, Xabier Vergara, Robin H. van der Weide, Ben Morris, Tom van Schaik, Stefano G. Manzo, Daniel Peric-Hupkes, Jeroen van den Berg, Roderick L. Beijersbergen, René H. Medema, and Bas van Steensel**

## SUPPLEMENTAL TABLES

*Supplemental Table 1, Related to the STAR Methods*

Epigenome ChIP datasets used in this study.

| Label      | description                                                         | chip_id                                  | sra_chip                                 | sra_input                                                              | reference                  |
|------------|---------------------------------------------------------------------|------------------------------------------|------------------------------------------|------------------------------------------------------------------------|----------------------------|
| H2AFZ      | Histone H2A.Z                                                       | GSM733786                                | SRR227661,<br>SRR227662                  | SRR227650,<br>SRR5331211,<br>SRR5331212,<br>SRR5331213                 | (Consortium,<br>2012)      |
| EZH2       | EZH2 (H3K27<br>methyltransferase)                                   | GSM1003576                               | SRR568431,<br>SRR568432                  | SRR227650,<br>SRR5331211,<br>SRR5331212,<br>SRR5331213                 | (Consortium,<br>2012)      |
| H3K79me2   | Histone<br>modification,<br>mostly on active<br>chromatin           | GSM733653                                | SRR227378,<br>SRR227379                  | SRR227650,<br>SRR5331211,<br>SRR5331212,<br>SRR5331213                 | (Consortium,<br>2012)      |
| H4K5acK8ac | Histone<br>modification,<br>mostly on active<br>chromatin           | GSE113635                                | SRR7070730,<br>SRR7070731                | SRR7070732                                                             | (Ott et al.,<br>2018)      |
| H3K9me2    | Histone<br>modification,<br>specific type of<br>heterochromatin     | GSM1846169,<br>GSM2152591                | SRR2148301,<br>SRR3503783                | SRR2148307                                                             | (Salzberg et<br>al., 2017) |
| CTCF       | Insulator and<br>looping factor                                     | GSM1782717,<br>GSM1782718                | SRR2085871,<br>SRR2085872                | SRR2085882,<br>SRR2085883,<br>SRR2085884,<br>SRR2085885,<br>SRR2085886 | (Schmidl et al.,<br>2015)  |
| H3K27ac    | Histone<br>modification,<br>mostly on active<br>chromatin           | GSM1782721,<br>GSM1782722                | SRR2085875,<br>SRR2085876                | SRR2085882,<br>SRR2085883,<br>SRR2085884,<br>SRR2085885,<br>SRR2085886 | (Schmidl et al.,<br>2015)  |
| H3K27me3   | Histone<br>modification,<br>specific type of<br>heterochromatin     | GSM1782749,<br>GSM1782750                | SRR2085903,<br>SRR2085904                | SRR2085882,<br>SRR2085883,<br>SRR2085884,<br>SRR2085885,<br>SRR2085886 | (Schmidl et al.,<br>2015)  |
| H3K36me3   | Histone<br>modification,<br>mostly on active<br>transcription units | GSM1782723,<br>GSM1782724                | SRR2085877,<br>SRR2085878                | SRR2085882,<br>SRR2085883,<br>SRR2085884,<br>SRR2085885,<br>SRR2085886 | (Schmidl et al.,<br>2015)  |
| H3K4me1    | Histone<br>modification,<br>mostly on active<br>chromatin           | GSM2773392,<br>GSM2773394,<br>GSM2773396 | SRR6010166,<br>SRR6010168,<br>SRR6010170 | SRR6010181                                                             | (Shah et al.,<br>2018)     |
| H3K4me2    | Histone<br>modification,<br>mostly on active<br>chromatin           | GSM2773399,<br>GSM2773400                | SRR6010173,<br>SRR6010174                | SRR6010181                                                             | (Shah et al.,<br>2018)     |

|         |                                                                                            |                                                |                                                |                        |                     |
|---------|--------------------------------------------------------------------------------------------|------------------------------------------------|------------------------------------------------|------------------------|---------------------|
| H3K4me3 | Histone modification, mostly on active chromatin                                           | GSM2773401, GSM2773403, GSM2773404, GSM2773406 | SRR6010175, SRR6010177, SRR6010178, SRR6010180 | SRR6010181             | (Shah et al., 2018) |
| POL2AS2 | RNA Polymerase II, phosphorylated at serine 2 of heptad repeat. Marks transcribed regions. | GSM935402                                      | SRR502194, SRR502195                           | SRR502641              | (Consortium, 2012)  |
| SMC3    | Subunit of cohesin                                                                         | GSM935310                                      | SRR502001, SRR502002                           | SRR502641              | (Consortium, 2012)  |
| POL2    | RNA Polymerase II. Marks transcribed regions.                                              | GSE91721                                       | SRR5111542, SRR5111543                         | SRR5111209, SRR5111210 | (Consortium, 2012)  |
| HDAC1   | Histone deacetylase                                                                        | GSE105837                                      | SRR6213961, SRR6213962                         | SRR5111209, SRR5111210 | (Consortium, 2012)  |
| HDAC2   | Histone deacetylase                                                                        | GSE91451                                       | SRR5111049, SRR5111050                         | SRR5111209, SRR5111210 | (Consortium, 2012)  |
| HDAC3   | Histone deacetylase                                                                        | GSE127356                                      | SRR8659957, SRR8659958                         | SRR5111896, SRR5111897 | (Consortium, 2012)  |

*Supplemental Table 2, Related to the STAR Methods*

| label       | description                                    | Source ID                                                      | PMID                      |
|-------------|------------------------------------------------|----------------------------------------------------------------|---------------------------|
| DNase       | DNase I accessibility                          | ENCF413AHU,<br>ENCF936BDN                                      | (Consortium,<br>2012)     |
| Dam         | Dam methylase accessibility                    | 4DNESTAJJM3X                                                   | (Leemans et al.,<br>2019) |
| LMNB1       | DamID of Lamin B1; nuclear lamina interactions | 4DNESTAJJM3X                                                   | (Leemans et al.,<br>2019) |
| Late repli. | Late replicating DNA regions                   | 4DNFIBIZK6EY,<br>4DNFIRKXCUW,<br>4DNFI5TMO13R,<br>4DNFIUCL6QG2 | (Dekker et al.,<br>2017)  |
| TTseq       | TT-seq; transcribed regions                    | <i>Bigwig tracks provided by authors</i>                       | (Schwalb et al.,<br>2016) |
| 5mC         | 5-methyl-cytosine                              | ENCF872YSC, ENCF669KCI                                         | (Consortium,<br>2012)     |

*Supplemental Table 3, Related to the STAR Methods*

| Name     | Sequence (5' -> 3')  | Target location (GRCh38)                      |
|----------|----------------------|-----------------------------------------------|
| LBR1     | GAAATTTGCCGATGGTGAAG | chr1 - 225,424,045-225,424,064<br>LBR exon 1  |
| LBR2     | GCCGATGGTGAAGTGGTAAG | chr1 - 225,424,038-225,424,057<br>LBR exon 1  |
| LBR12    | GTGAAGTGGTAAGAGGTCGA | chr1 - 225,424,031-225,424,050<br>LBR exon 1  |
| LBR15    | TCATAATAAAGTGAAGTCCC | chr1 - 225,424,031-225,424,050<br>LBR exon 1  |
| LMNA_KO1 | ACTGAGAGCAGTGCTCAGTG | chr1 - 156,130,700-156,130,719<br>LMNA exon 2 |
| LMNA_KO2 | TCTCAGTGAGAAGCGCACGC | chr1 + 156,130,713-156,130,732<br>LMNA exon 2 |
| LMNA_KO4 | GGCGAGCTGCATGATCTGCG | chr1 + 156,130,738-156,130,757<br>LMNA exon 2 |
| LBR_KO1  | AGGCCGACATTAAGGAAGCA | chr1 - 225,422,116-225,422,135<br>LBR exon 2  |

Supplemental Table 4, Related to Methods

| Name              | Number           | Sequence (5' -> 3')                                                                                                 |
|-------------------|------------------|---------------------------------------------------------------------------------------------------------------------|
| IPR-PB oligo-fw   | ODS0001          | ACAAC TAGAATGCTAGCGT GACTGGAGTTCA<br>GACGTGTGCTCTTCCGATCTAATTTCTACTTC<br>ATAATAAAGTGA ACTCCCAGGCCATCGACCT<br>CTTACC |
| IPR-PB oligo-rv   | ODS0002          | TGATCGGTACCAACTCCAGCAGGACCATGTG<br>ATCGAAAATGCCAAGTAGGAAATTTGCCGAT<br>GGTGAAGTGGTAAGAGGTTCGATGGCCTGGG<br>AG         |
| PB_NheI_constr_fw | TAC0001          | ACAAC TAGAATGCTAGCGTG                                                                                               |
| PB_KpnI_constr_rv | TAC0002          | TGATCGGTACCAACTCCAG                                                                                                 |
| barcode primer-fw | TAC0003          | ACTGATCATGGGTACCGATCA(N)16TTGTGGC<br>CGGCCCTTGTGACCTGCA                                                             |
| barcode primer-rv | TAC0004          | AAAAGCGCGCATACTAGATTAACCCTAGAAA<br>GATAATCATATTG                                                                    |
| LBR12_oligo_fw    | ODS0011          | CACCGGTGAAGTGGTAAGAGGTCGA                                                                                           |
| LBR12_oligo_rv    | ODS0012          | AAACTCGACCTCTTACCACTTCACC                                                                                           |
| LBR15_oligo_fw    | ODS0017          | CACCGTCATAATAAAGTGA ACTCCC                                                                                          |
| LBR15_oligo_rv    | ODS0018          | AAACGGGAGTTCAC TTTATTATGAC                                                                                          |
| LBR21_oligo_fw    | ODS0029          | CACCGAGGCCGACATTAAGGAAGCA                                                                                           |
| LBR21_oligo_rv    | ODS0030          | AAACTGCTTCCTTAATGTTCGGCCTC                                                                                          |
| LMNAKO1_oligo_fw  | ODS0033          | CACCGACTGAGAGCAGTGCTCAGTG                                                                                           |
| LMNAKO1_oligo_rv  | ODS0034          | AAACCACTGAGCACTGCTCTCAGTC                                                                                           |
| LMNAKO2_oligo_f   | ODS0035          | CACCGTCTCAGTGAGAAGCGCACGC                                                                                           |
| LMNAKO2_oligo_rv  | ODS0036          | AAACGCGTTCGCTTCTCACTGAGAC                                                                                           |
| LMNAKO4_oligo_fw  | ODS0039          | CACCGGGCGAGCTGCATGATCTGCG                                                                                           |
| LMNAKO5_oligo_rv  | ODS0040          | AAACCGCAGATCATGCAGCTCGCCC                                                                                           |
| LBRKO_TIDE_fw     | TAC0179          | ACATAAAGCGGAAGACAAAAGGC                                                                                             |
| LBRKO_TIDE_rv     | TAC0180          | TGCATTTGTCTCATGAAAGATGGAT                                                                                           |
| LMNAKO_TIDE_fw    | TAC0177          | AGGATGCCCTCTCCTGGTAA                                                                                                |
| LMNAKO_TIDE_rv    | TAC0178          | CTGTGGTAGATCCCATTGGC                                                                                                |
| TIDE_endo_LBR_F   | TAC0017          | GTAGCCTTTCTGGCCCTAAAAT                                                                                              |
| TIDE_endo_LBR_R   | TAC0018          | AAATGGCTGTCTTTCCAGTAA                                                                                               |
| indelPCR1-fw-BC   | TAC0007.1-<br>24 | ACACTCTTTCCCTACACGACGCTCTTCCGATC<br>T(N)10GTCACAAGGGCCGCCACA                                                        |
| indelPCR1-rv      | TAC0012          | GTGACTGGAGTTCAGACGTGTGCTCTTCCGA<br>TCT                                                                              |
| indelPCR2-fw      | TAC0009          | AATGATACGGCGACCACCGAGATCTACACTC<br>TTTCCCTACACGACGCTCTTCCGATCT                                                      |
| indelPCR2-rv      | TAC0011          | CAAGCAGAAGACGGCATAACGAGATGTGACT<br>GGAGTTCAGACGTGTGCTCTTCCGATCT                                                     |
| indelPCR2-rv-BC   | TAC0159.1-<br>96 | CAAGCAGAAGACGGCATAACGAGAT(N)6GTG<br>ACTGGAGTTCAGACGTGTGCTCTTCCGATCT                                                 |
| Tn5_adpt_A1       | TAC0101          | TCGTCGGCAGCGTCAGATGTGTATAAGAGAC<br>AG                                                                               |
| Tn5_adpt_A2_invdT | TAC0102          | /5Phos/CTGTCTCTTATACACATC/3InvdT/                                                                                   |
| Tn5_enr_5ITR      | TAC0099          | CATTGACAAGCACGCCTCAC                                                                                                |

|                         |            |                                                                    |
|-------------------------|------------|--------------------------------------------------------------------|
| Tn5_enr_3ITR            | TAC0006    | TTTTACGCATGATTATCTTTAACGTACGTC                                     |
| Tn5_PCR1_F_5ITR         | TAC0161    | GTCTCGTGGGCTCGGAGATGTGTATAAGAGA<br>CAGCGTCAATTTTACGCAGACTATC       |
| Tn5_PCR1_F_3ITR         | TAC0110    | GTCTCGTGGGCTCGGAGATGTGTATAAGAGA<br>CAGGTACGTCACAATATGATTATCTTTCTAG |
| Illumina_Nextera_N5xx   | N5xx       | ACGGCGACCACCGAGATCTACAC(N)8TCGTC<br>GGCAGCGTC                      |
| Tn5_PCR2_R              | TAC0103    | AATGATACGGCGACCACCGA                                               |
| Illumina_Nextera_N7xx   | N7xx       | CAAGCAGAAGACGGCATAACGAGAT(N)8GTCT<br>CGTGGGCTCGG                   |
| Sanger_map_IPR_for      | TAC0065    | ATGCTAGCGTGAAGTGGAGTT                                              |
| Chr20_IPR5_rev          | TAC0126    | AGCAGACAAGGCTCACAGCAGC                                             |
| Chr7_IPR8_rev           | TAC0128    | ACTGCTGCCCGGCGAATTGT                                               |
| Tn5_indel_enr           | TAC0078    | TCATTTTCGTATTTTATTTACGCCAGGG                                       |
| Tn5_indel_PCR1_F        | TAC0238    | GTCTCGTGGGCTCGGAGATGTGTATAAGAGA<br>CAGGTCACAAGGGCCGGCCACA          |
| bcPCR_ChIP              | TAC0162    | GTGACTGGAGTTCAGACGTGTGCTCTTCCGA<br>TCTGATCACATGGTCCTGCTGGAGTTG     |
| qPCR_PrimerBank_PolQ_F  | TAC0204    | CTGCGTCGGAGTGGGAAAC                                                |
| qPCR_PrimerBank_PolQ_R  | TAC0205    | CTGTAGGCTTGCATTCTCCTG                                              |
| qPCR_PrimerBank_Lig4_F  | TAC0206    | AGCAAAAGTGGCTTATACGGATG                                            |
| qPCR_PrimerBank_Lig4_R  | TAC0207    | TGAGTCCTACAGAAGGATCATGC                                            |
| qPCR_PrimerBank_CtIP_F  | TAC0208    | CAGGAACGAATCTTAGATGCACA                                            |
| qPCR_PrimerBank_CtIP_R  | TAC0209    | GCCTGCTCTTAACCGATCTTCT                                             |
| qPCR_PrimerBank_Rad51_F | TAC0210    | CAACCCATTTACGGTTAGAGC                                              |
| qPCR_PrimerBank_Rad51_R | TAC0211    | TTCTTTGGCGCATAGGCAACA                                              |
| qPCR_PrimerBank_BRCA1_F | TAC0212    | GAAACCGTGCCAAAAGACTTC                                              |
| qPCR_PrimerBank_BRCA1_R | TAC0213    | CCAAGTTAGAGAGTTGGACAC                                              |
| qPCR_PrimerBank_BRCA2_F | TAC0214    | CACCCACCCTTAGTTCTACTGT                                             |
| qPCR_PrimerBank_BRCA2_R | TAC0215    | CCAATGTGGTCTTTGCAGCTAT                                             |
| qPCR_TBP_F              | qPCR_TBP_F | CGGCTGTTTAACTTCGCTTC                                               |
| qPCR_TBP_R              | qPCR_TBP_R | CACACGCCAAGAAACAGTGA                                               |

## **SUPPLEMENTAL FIGURES**

# Supplemental Figure 1

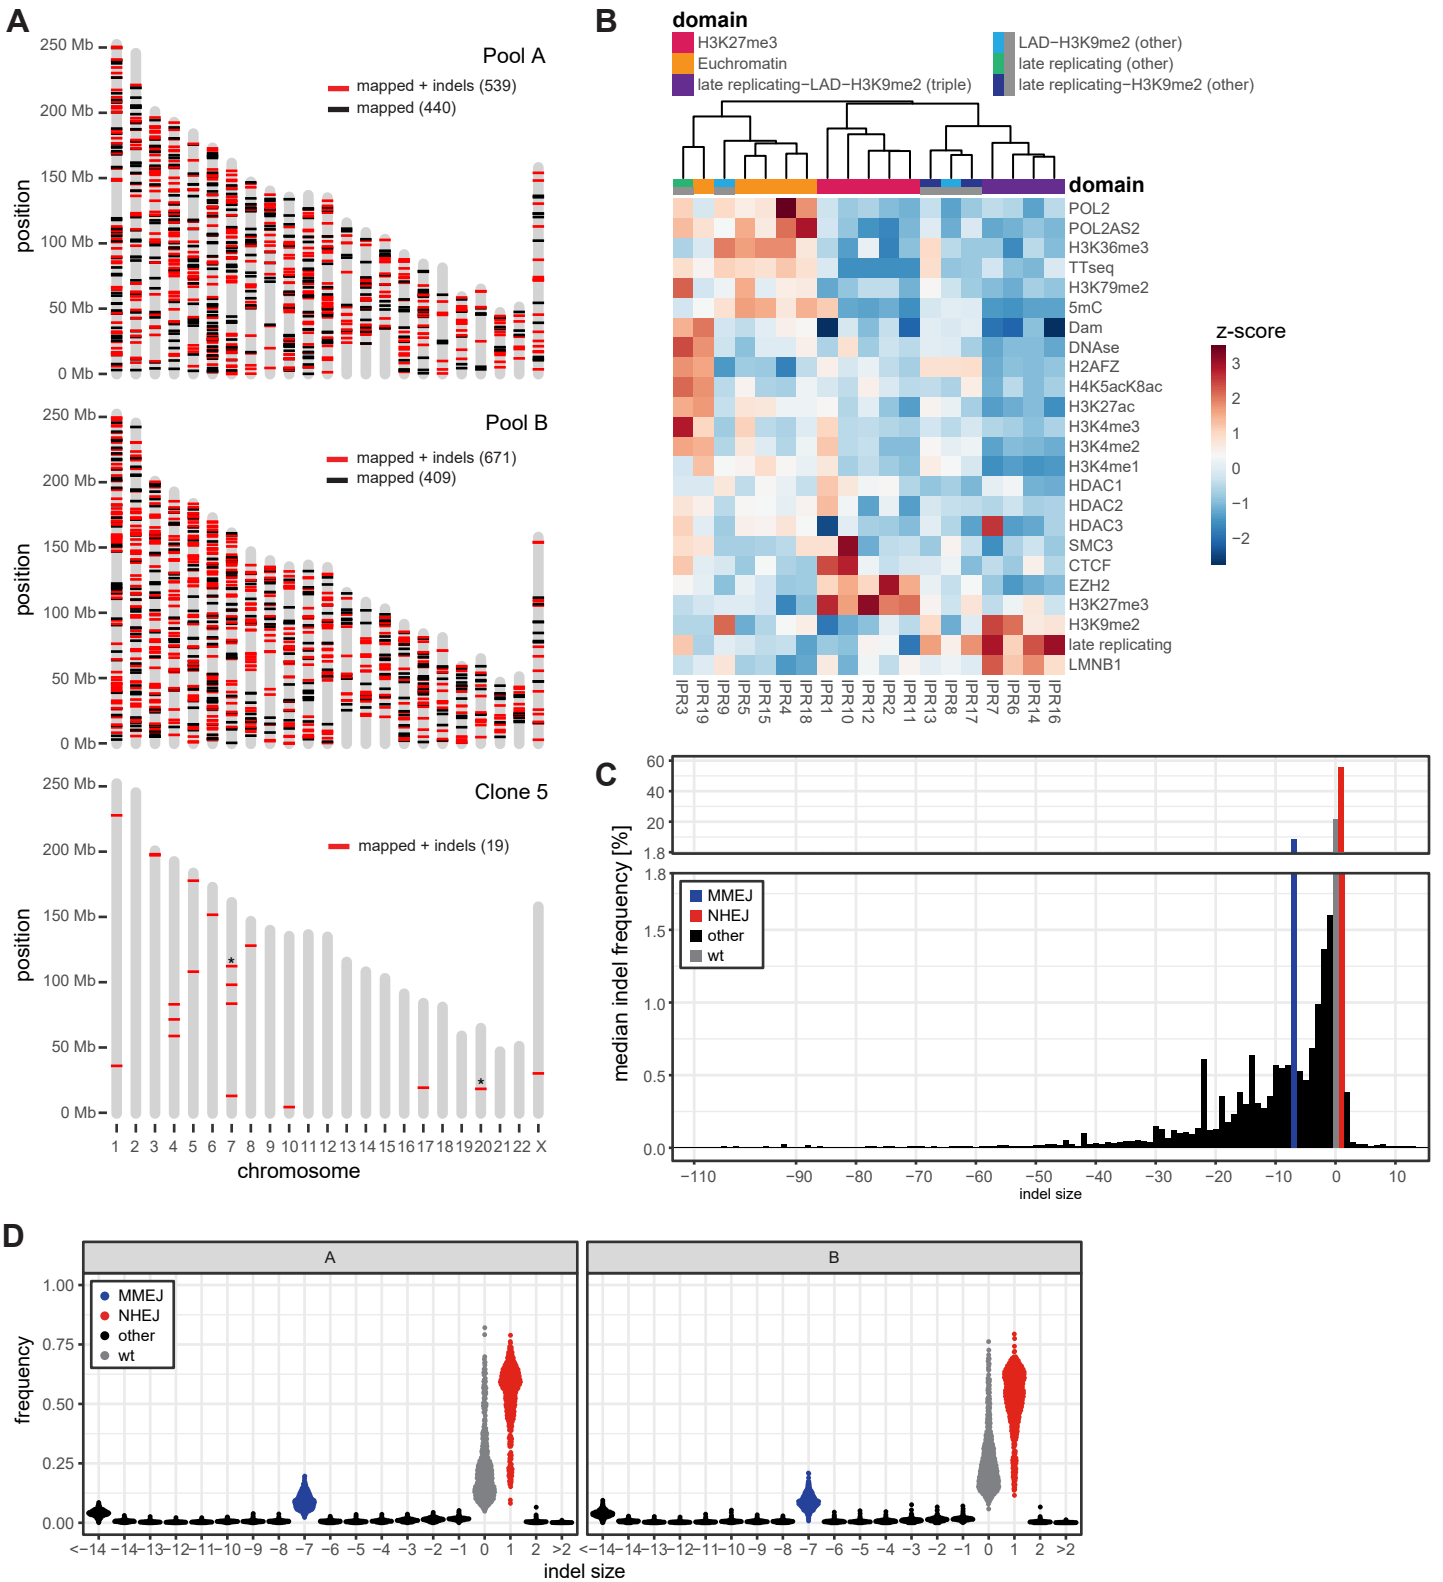



### **Supplemental Figure S1: Genomic location, chromatin context and indel frequencies of IPRs.**

Related to Figure 2

(A) Genomic locations of the mapped IPRs in each of the two cell pools (Pools A and B) and in clone 5. Red: uniquely mapped IPRs with indel data that passed the quality criteria (also shown in [Figure 2A](#)); black: uniquely mapped IPRs that did not pass the indel quality criteria. The stars in clone 5 indicate the two IPRs mapped with tagmentation (see STAR Methods) (B) Heatmap of chromatin features at each IPR integration site in clone 5. Levels of chromatin features are represented as z-scores. IPRs are clustered based on similarities of the z-scores. (C) Median indel frequencies across all IPRs. Note that the y-axis is split in order to highlight the low frequency indels. Data are same as [Figure 2C](#) but the median frequencies are plotted over a wider range of indel sizes to illustrate that large indels are rare compared to -7 and +1. (D) Frequencies of the indels as in [Figure 2C](#) but plotted separately for cell pools A (539 IPRs) and B (690 IPRs). Data are average of 2-6 independent replicates.

## Supplemental Figure 2

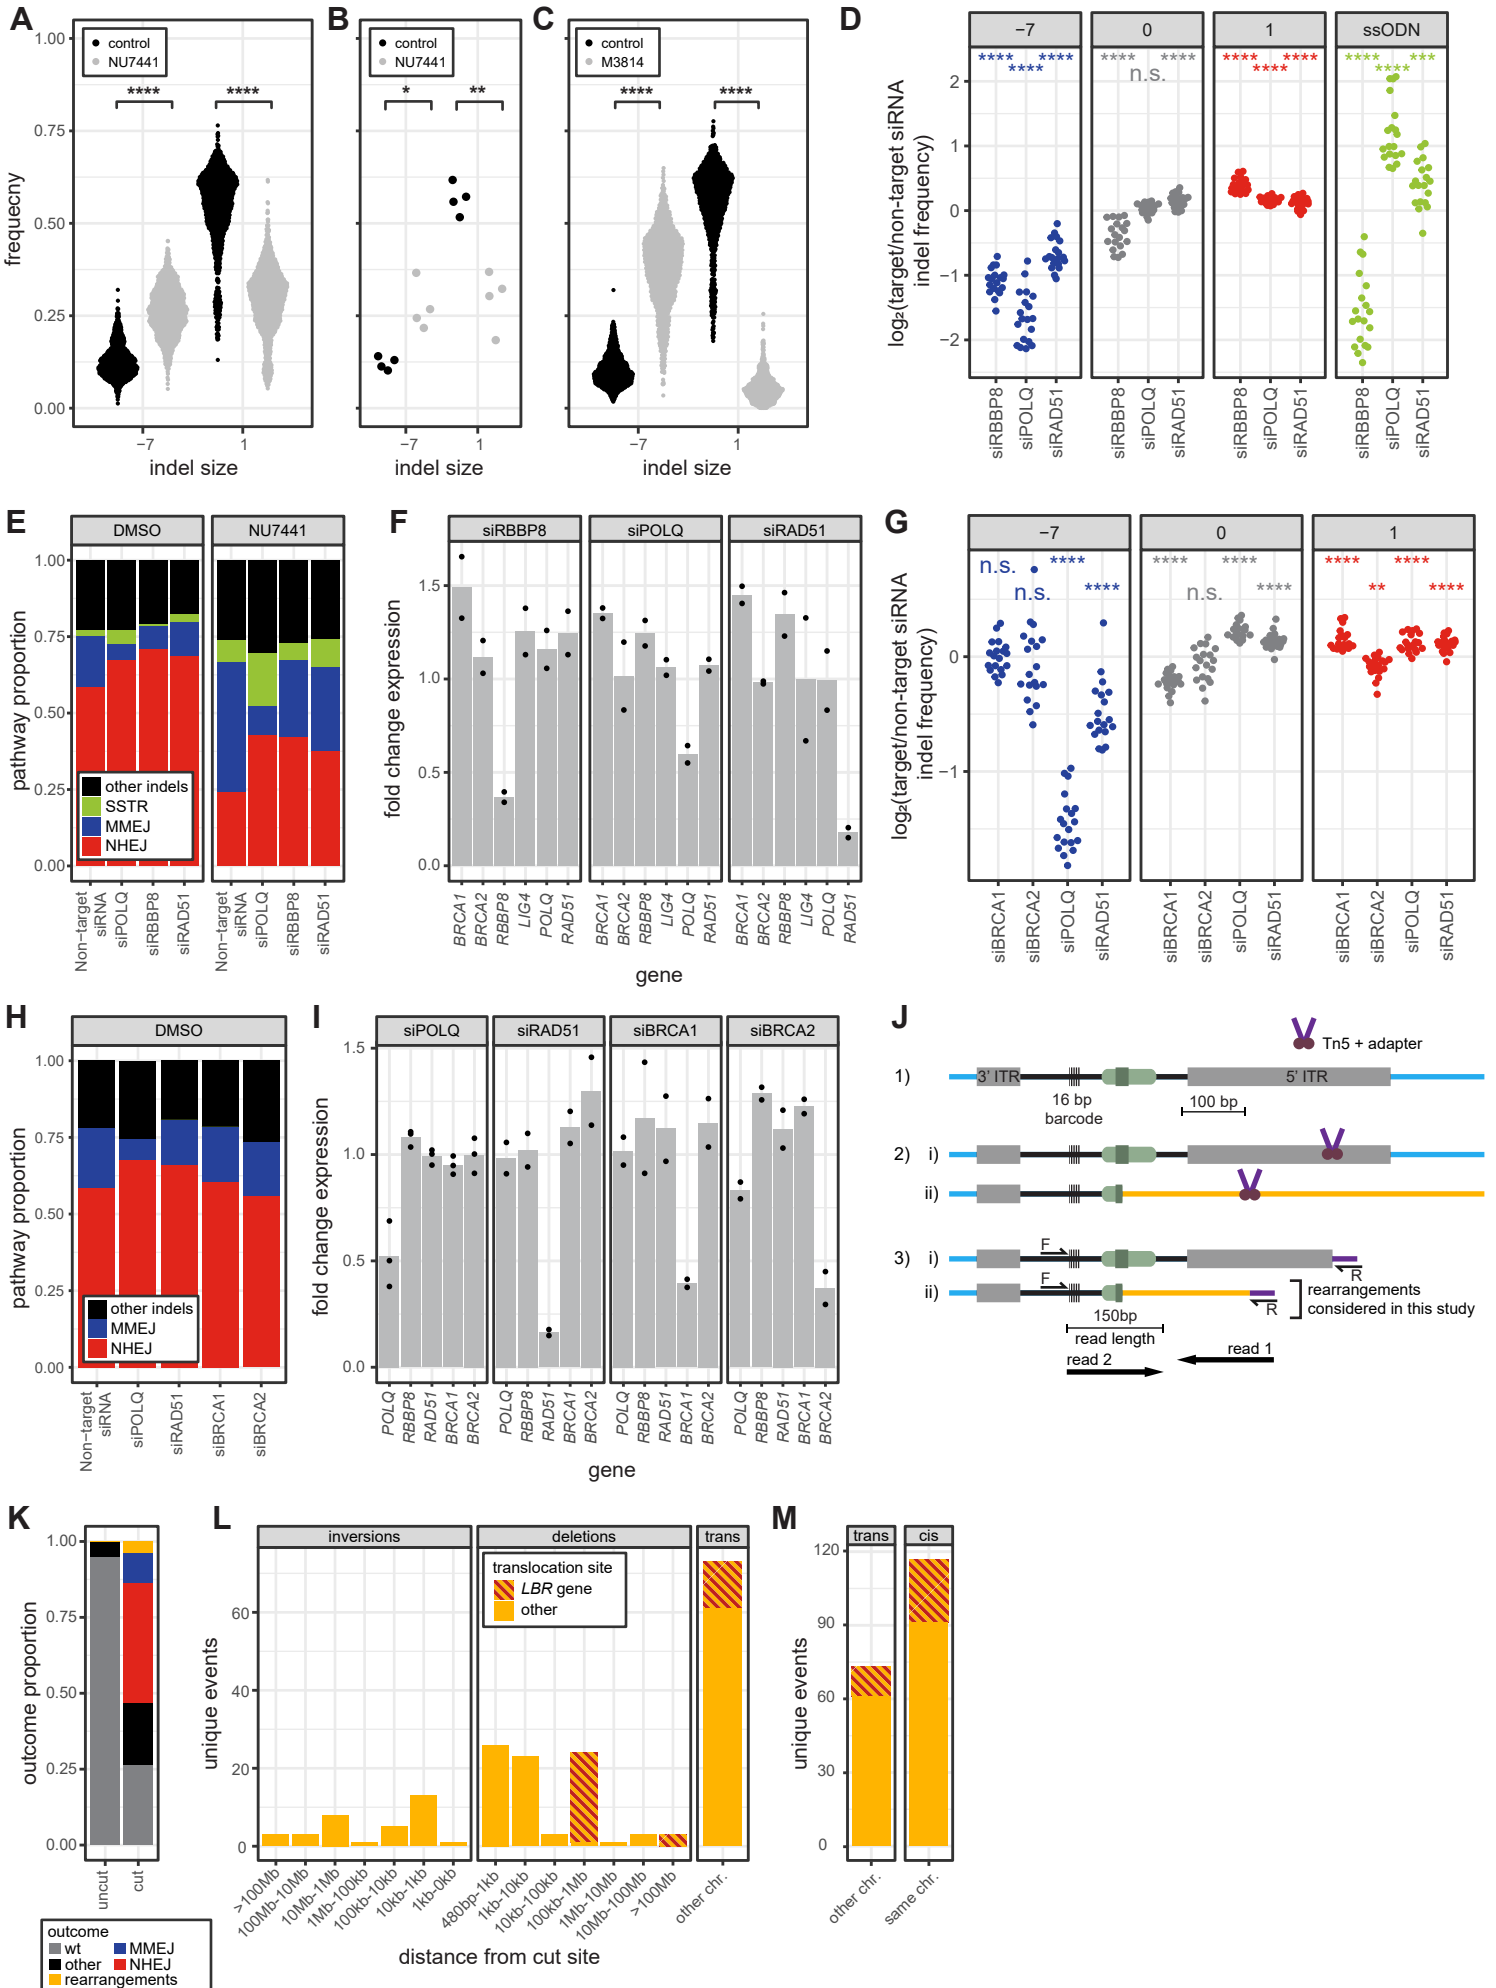

## Supplemental Figure S2. Characterization of pathways that generate reporter indels.

Related to Figure 2

(A-C) Effects of chemical inhibition of DNA-PKcs on indel frequencies. P-values are according to a paired t-test. (A) Frequency of +1 and -7 indels for all IPRs (1118 IPRs) in the cell pools treated with the DNA-PKcs inhibitor NU7441 (gray, mean of  $n = 2-4$ ) or with DMSO control (black, mean of  $n = 2-4$ ). (B) Same data as in (A), but now shown as median indel frequencies of all IPRs, for each replicate experiment. (C) Frequency of +1 and -7 indels for all IPRs (975 IPRs) in the cell pools treated with the DNA-PKcs inhibitor M3814 (gray, mean of  $n = 2$ ) or with DMSO control (black,  $n = 2$ ). (D-E) Effect of knockdown of various DSB repair proteins on indel frequencies. (D) Log<sub>2</sub> fold-change in the frequencies of the wt, -7, +1 and ssODN-induced +2 indels at all 19 IPRs in clone 5, after siRNA-mediated knockdown of the indicated proteins compared to a control siRNA ( $n = 2$ ). P-values are according to one sample t-test. Asterisks in panels A-D, G denote adjusted p-values: \*  $p < 0.05$ ; \*\*  $p < 0.01$ ; \*\*\*  $p < 0.001$ ; \*\*\*\*  $p < 0.0001$ . (E) Relative contribution of each pathway for all 19 barcodes in clone 5 combined, after indicated siRNA treatments. Red: +1 insertion (NHEJ); blue: -7 deletion (MMEJ); green: +2 insertion due to SSTR; black: other indels. Right-hand panel shows data from cells treated with NU7441 (1  $\mu$ M); left-hand panel shows data from control cells. (F) Mean mRNA expression fold change of several genes encoding DSB repair proteins after siRNA-mediated knockdown of indicated proteins, in same cells as in (E). Dots represent separate replicates. (G-H) Changes in indel frequencies and proportions after siRNA-mediated knockdown of indicated proteins. (I) Mean mRNA expression fold change in cell samples show in (G-H). Dots represent separate replicates. (J) Cartoon illustrating Tn5-mediated detection of rearrangements between barcoded IPRs and distal DNA sequences (orange) after Cas9-mediated cutting of the IPR. After purification of genomic DNA, random integration of Tn5 transposase loaded with an adaptor oligonucleotide allows for selective PCR amplification of the junctions using primers F and R. Large rearrangements were identified by paired-end sequencing of the PCR products, provided that the Tn5 integrates in a unique genomic sequence sufficiently close to the barcode (ii) but not inside the IPR (i). Furthermore, large rearrangements were only counted if their junction was located at the break site (read 2), and if read 1 matched the same genomic location as read 2. Smaller indels, which by definition do not involve a distal genomic sequence, were identified from read 2 alone. (K) Proportions of small indels in IPRs and of rearrangements between IPRs and unique genomic DNA sequences, Cas9 activation (cut) or in control cells (uncut). Rearrangements are only counted if the ligated sequence maps outside of the IPR. These values were not filtered on unique Tn5 integration sites. (L) Numbers and size distributions of detected rearrangements between IPRs and unique genomic sequences after Cas9 cutting, divided into inversions, deletions and translocations (trans). Rearrangements involving the *LBR* gene (which is also cut) are striped. Unique Tn5 integration sites are considered as unique events (M) Same data as in (L) with the insertions and deletions combined as *cis*.

# Supplemental Figure 3

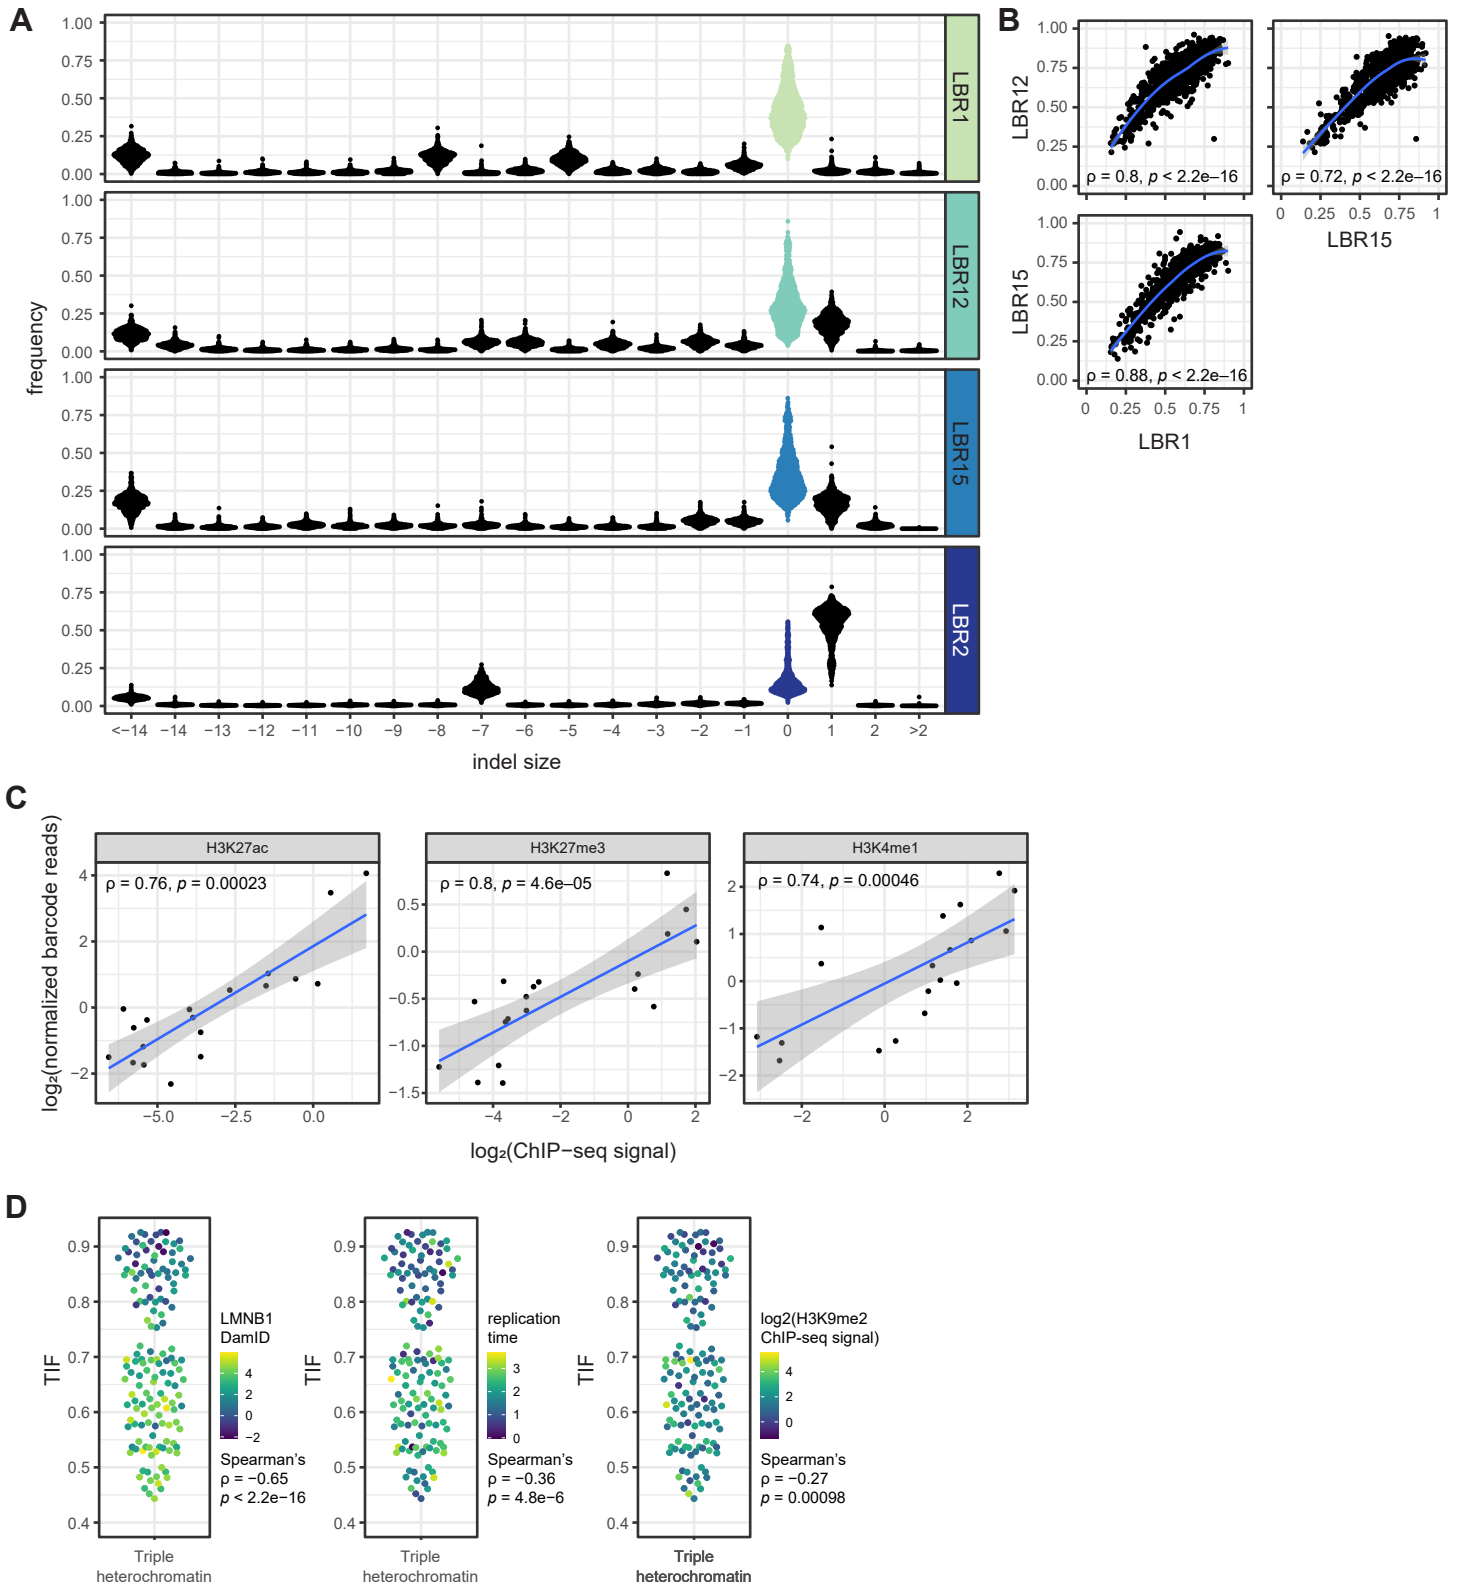

### **Supplemental Figure S3: IPRs generally adopt the chromatin state of their integration site.**

Related to Figure 3

(A) Frequencies of the indels for all four tested sgRNAs targeting the IPRs. (B) Pairwise comparisons of total indel frequencies obtained with sgRNAs LBR1, LBR12 and LBR15. Blue lines are loess fits.  $\rho$  is Spearman's rank correlation coefficient. (C) IPRs generally adopt the chromatin state of their integration site. Vertical axes:  $\log_2$  normalized barcode reads of 19 IPRs in clone 5 after ChIP of the indicated histone modifications, followed by PCR amplification of the barcodes and Illumina sequencing. Data are average of two independent replicates. Horizontal axes:  $\log_2$  normalized signal of the indicated histone modifications in a window of 2kb centered on the IPR integration site ( $n = 2$ ), according to public ChIP-seq data from K562 cells (see [Table S1](#)). Blue lines and gray shading show linear regression fits with 95% confidence intervals.  $\rho$  is Spearman's rank correlation coefficient.

# Supplemental Figure 4

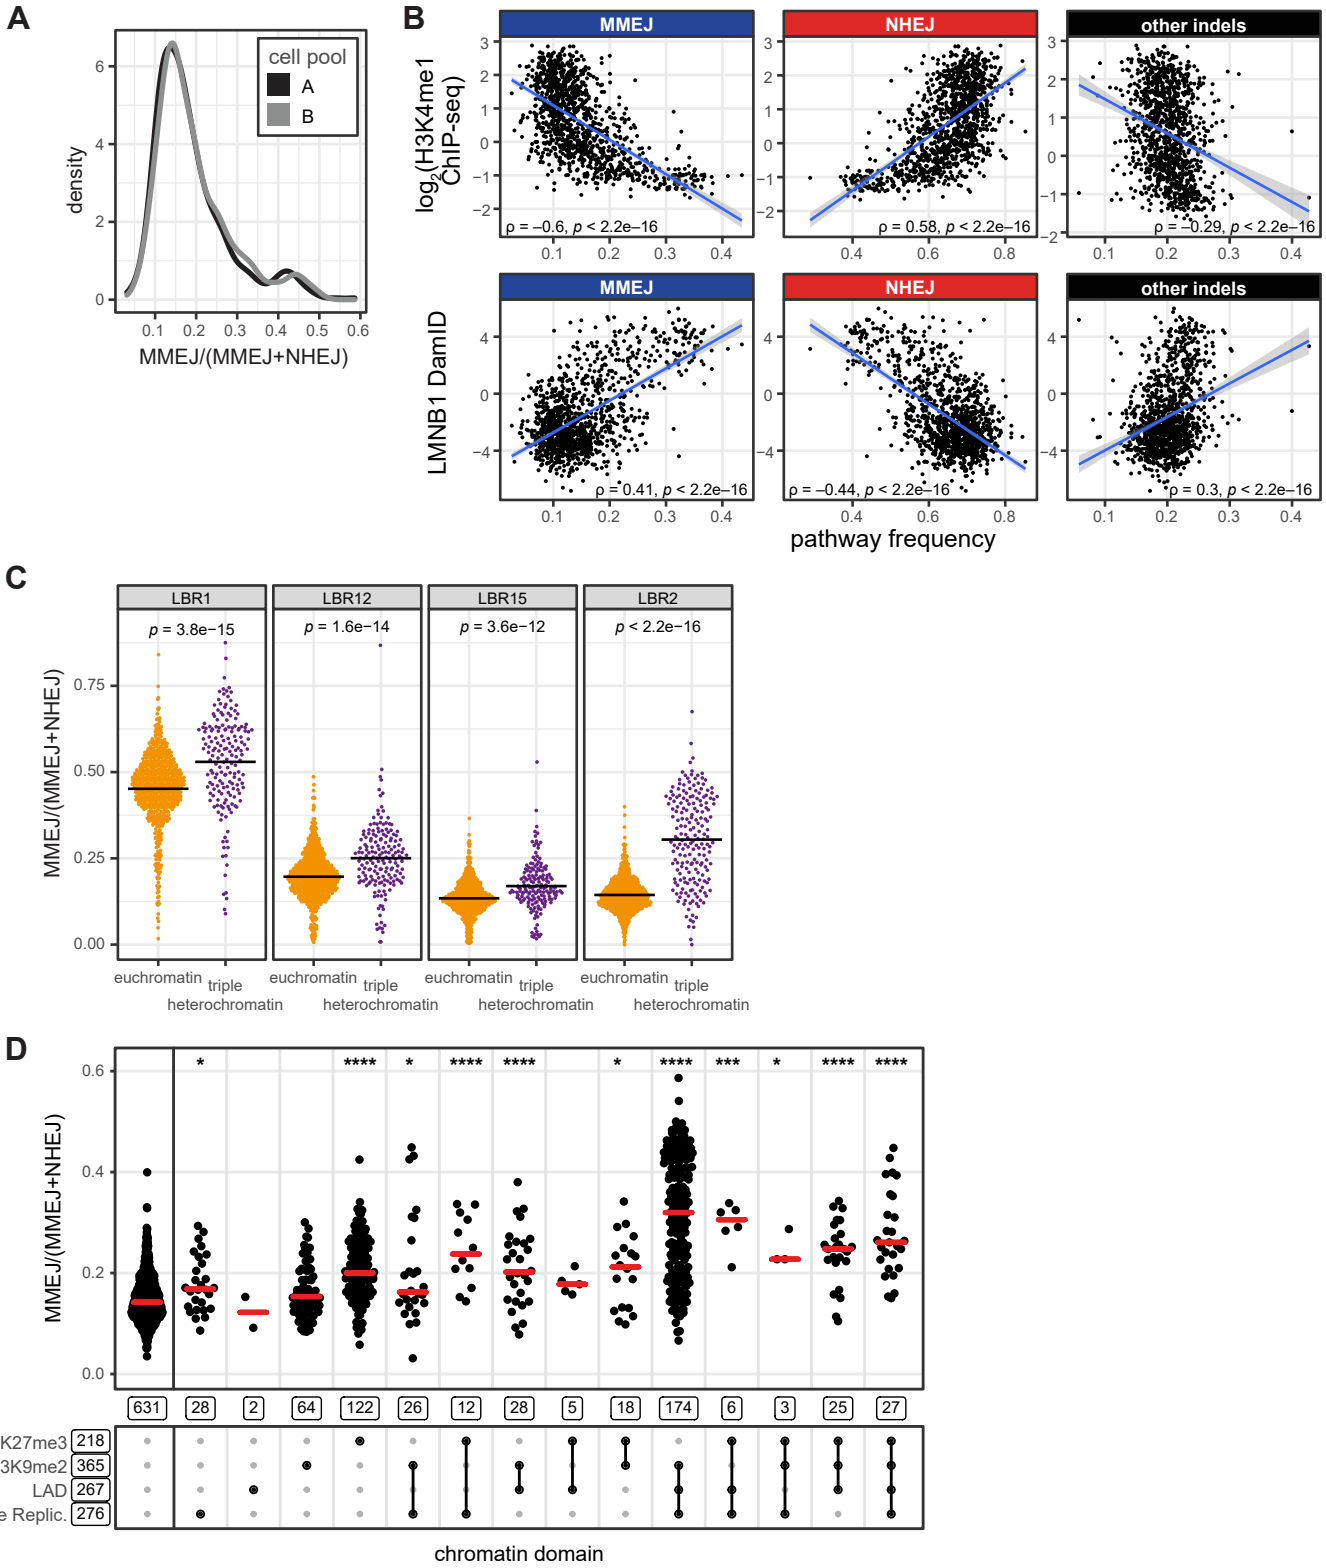

### Supplemental Figure S4: Correlations between pathway usage and chromatin features.

Related to Figure 4

(A) Distributions of MMEJ:NHEJ balances across IPRs, for each cell pool separately. (B) Scatterplots of the relative indel frequencies in the IPR cell pools versus local  $\log_2$  H3K4me1 ChIP-seq signal (top row) or  $\log_2$  Lamin B1 DamID signal (bottom row) at the IPR integration sites.  $\rho$  is Spearman's correlation coefficient; blue lines and grey shading show linear regression fits with 95% confidence intervals. (C) MMEJ:NHEJ balance for the four gRNAs used in this study in euchromatin and triple heterochromatin (as defined in [Figure 3E, 4D](#)), see Methods. P-values are according to Wilcoxon test. (D) Same as [Figure 4D](#), but now including heterochromatin types with 20 or fewer IPRs. Asterisks mark p-values according to the Wilcoxon test, compared to euchromatin IPRs (most left column): \*  $p < 0.05$ , \*\*  $p < 0.01$ , \*\*\*  $p < 0.001$ , \*\*\*\*  $p < 0.0001$ .

Supplemental Figure 5

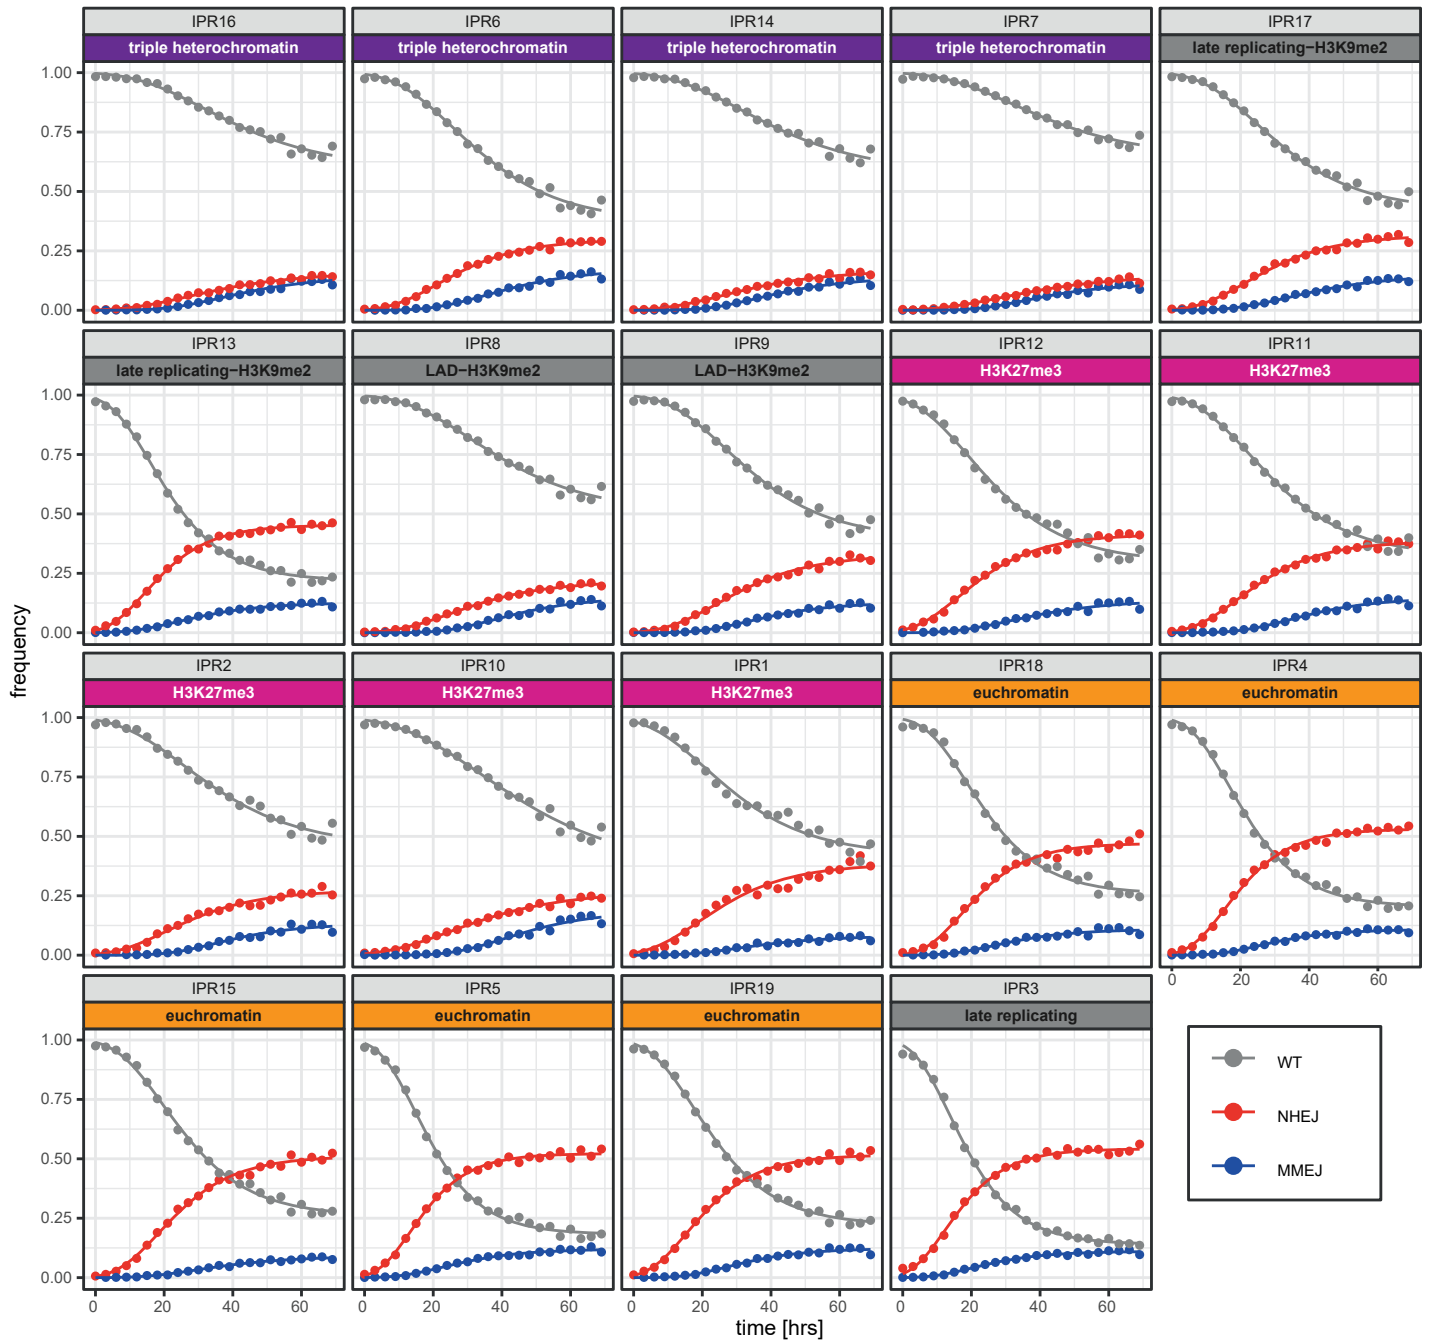



**Supplemental Figure S5: Time series of -7 and +1 indel accumulation for all IPRs in clone 5.**

Related to Figure 5

Time curves of the +1 insertion (red) and -7 deletion (blue) for all 19 individual IPRs. Dots are measured values; lines are fitted sigmoid curves.

# Supplemental Figure 6

**A**

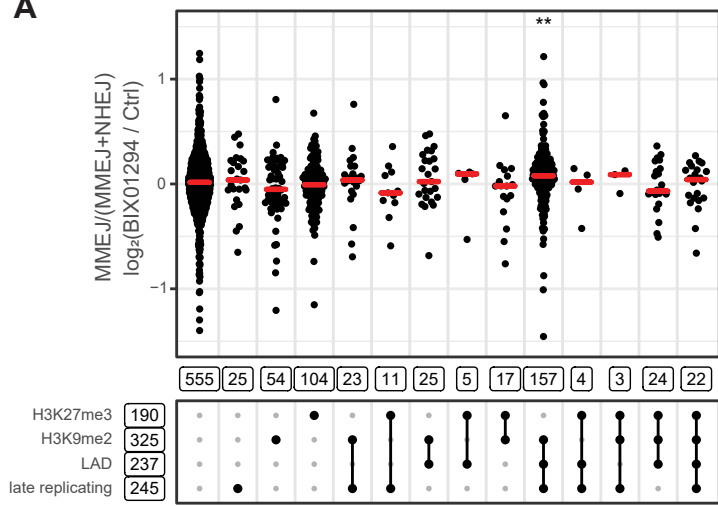

**B**

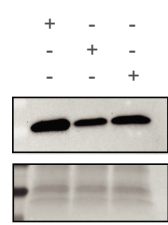

**C**

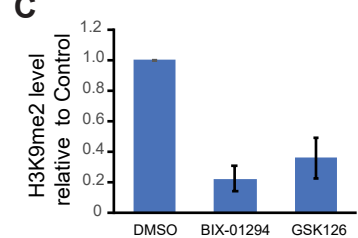

**D**

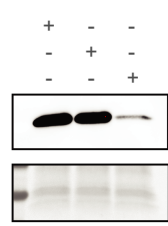

**E**

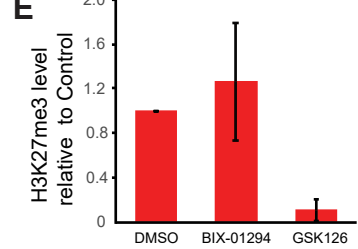

**F**

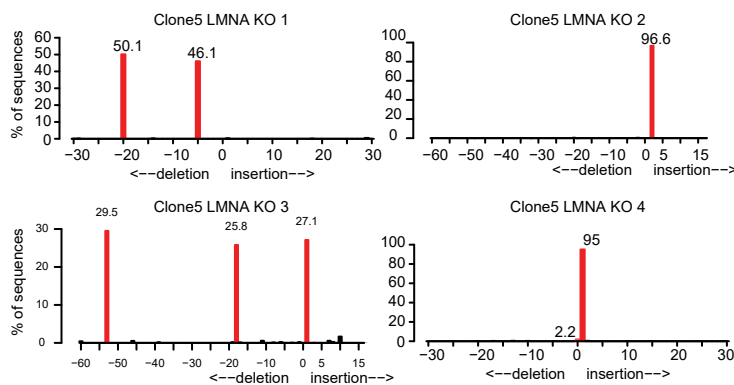

**G**

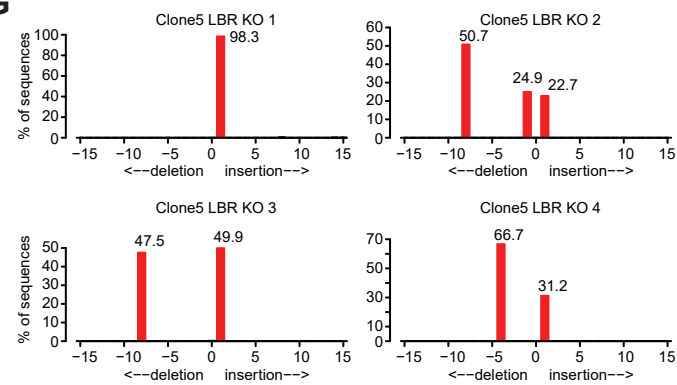

**H**

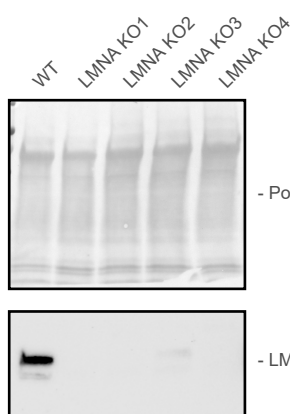

**I**

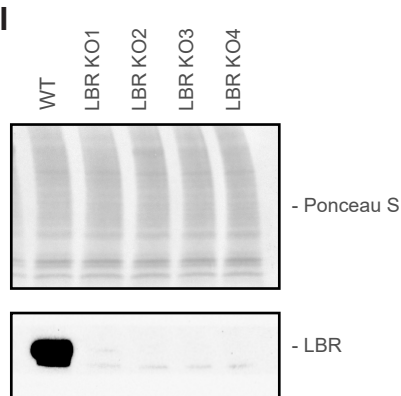

**J**

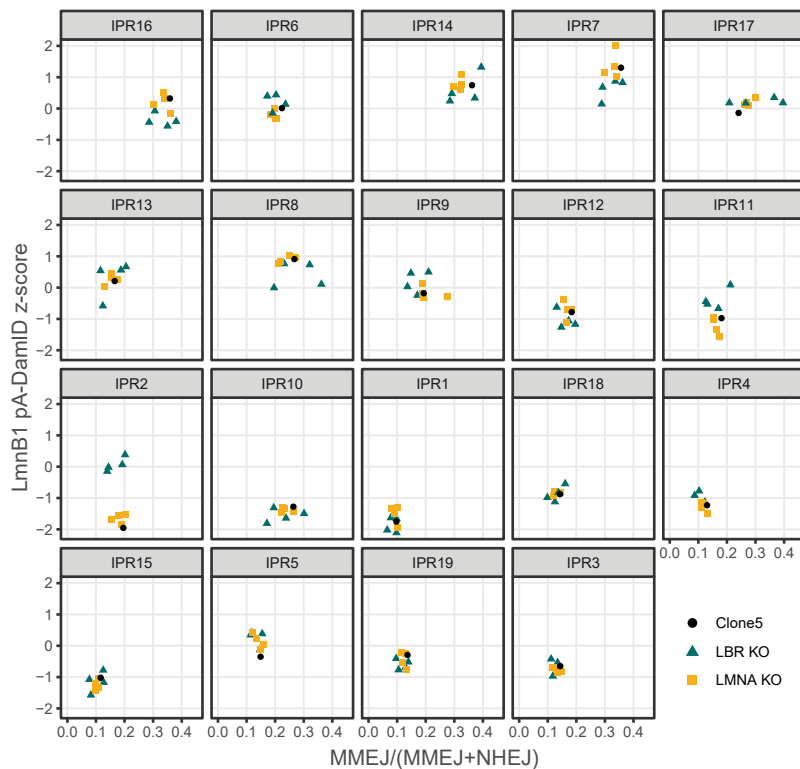

**K**

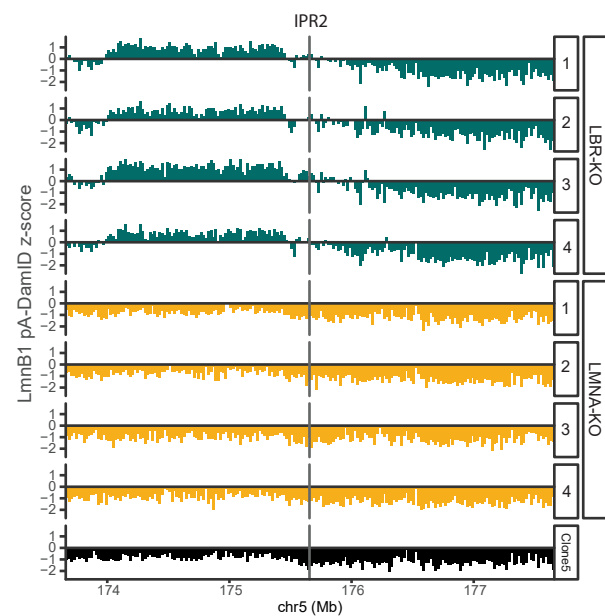

**L**

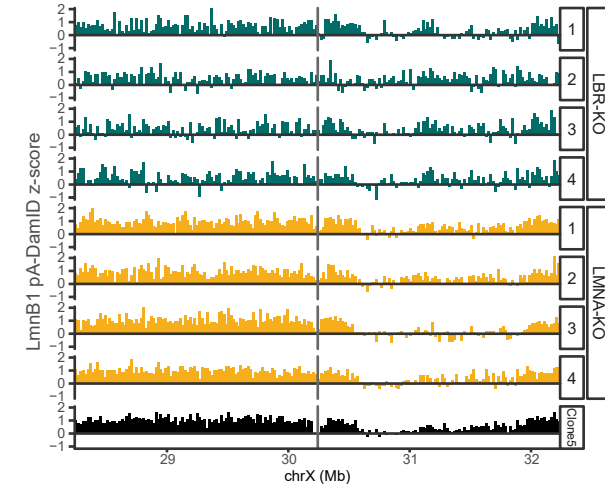

### Supplemental Figure S6: Effects of heterochromatin perturbations.

Related to Figure 6

(A) Log<sub>2</sub> fold-change of MMEJ:NHEJ balance in BIX01294 treated cells (n = 2) compared to non-treated cells for 1029 IPRs divided by heterochromatin domains (n = 2-6; same data as in [Figure 2](#)). Wilcoxon test compared to non-heterochromatin IPRs (most left column), \* p < 0.05, \*\* p < 0.01, \*\*\* p < 0.001, \*\*\*\* p < 0.0001. (B) Western blot of H3K9me2 in clone 5 cells after treatment with either 1 μM GSK126 or 500 nM BIX01294. (C) Quantification of Western blots (mean of two independent replicates, error bars show S.D.), normalized to H3K9me2 levels in control cells and red ponceau staining for protein content. (D-E) Same as B and C but for H3K27me3. (F-G) Indel patterns inside the *LMNA* (E) and *LBR* (F) genes in respective knockout sub-clones that were derived from clone 5, showing frameshifts (i.e., indel sizes that are not multiples of three) in all alleles. Note that chromosomes in K562 cells can be tri- or tetraploid. Indel spectra were obtained by TIDE (Brinkman et al., 2014). (H-I) Western blots of LMNA (H) and (I) LBR in WT (clone 5) and in the four knock-out clones. (J) Scatterplot of MMEJ:NHEJ balance compared to LMNB1 pA-DamID z-score for each IPR, averaged over 10kb up and downstream of the IPR. Black circle is clone5, green triangles are the LBR KO clones and yellow squares are LMNA KO clones. (K) Z-score of pA-DamID tracks for LMNB1 centered on IPR17 with 2Mb up and downstream. (n = 2) (L) Same as in K but for IPR2.

# Supplemental Figure 7

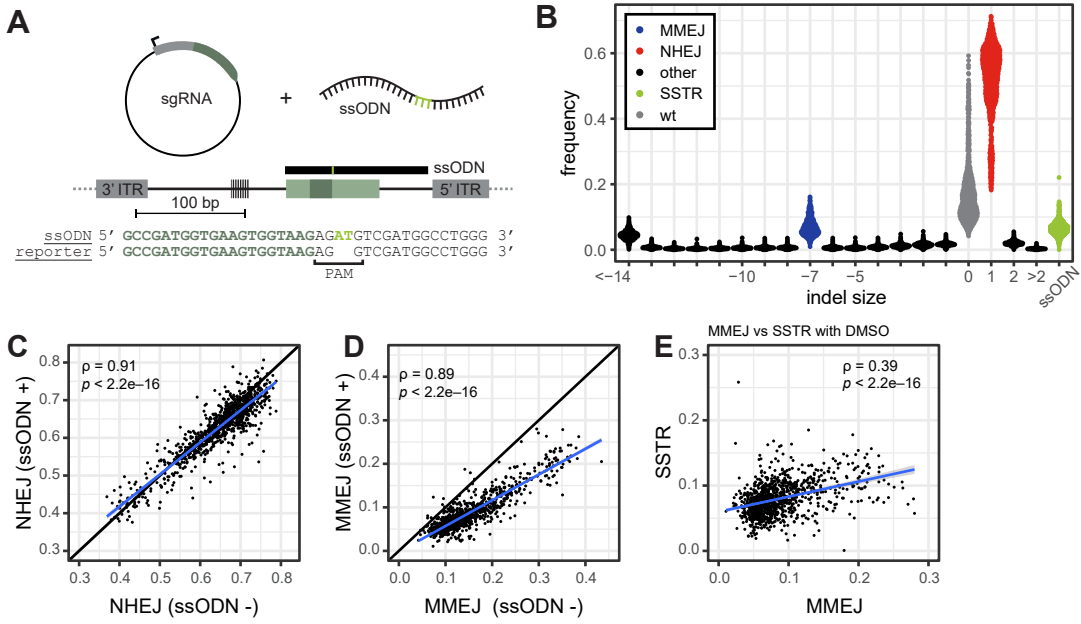

### Supplemental Figure S7: Chromatin context effects on the SSTR pathway.

Related to Figure 7

(A) Schematic of the strategy to probe SSTR simultaneously with NHEJ and MMEJ. Prior to Cas9 activation, the ssODN is co-transfected with a plasmid that encodes the LBR2 sgRNA. The ssODN (black bar) covers the reporter sequence but not the barcode, and contains a 2 bp insertion (green) at the PAM. (B) Indel frequencies generated by NHEJ, MMEJ and SSTR in 965 IPRs in the two cell pools, 64 hours after Cas9 activation (average of two replicate experiments). (C-D) Comparison of +1 (NHEJ; panel C) and -7 (MMEJ, panel D) indel frequencies in all IPRs in cell pools in the presence (+) or absence (-) of the ssODN. Black line: diagonal. (E) Comparison of MMEJ and SSTR frequencies across all IPRs in cell pools treated with the ssODN. (C-E)  $\rho$  is Pearson's correlation coefficient; blue lines and grey shading show linear regression fits with 95% confidence intervals.
